# Supplementary material for: Genetical genomics of growth in a chicken model
Source: PubMed Central journal article supplement (PMC5782384; doi:10.1186/s12864-018-4441-3), 2018-01-23

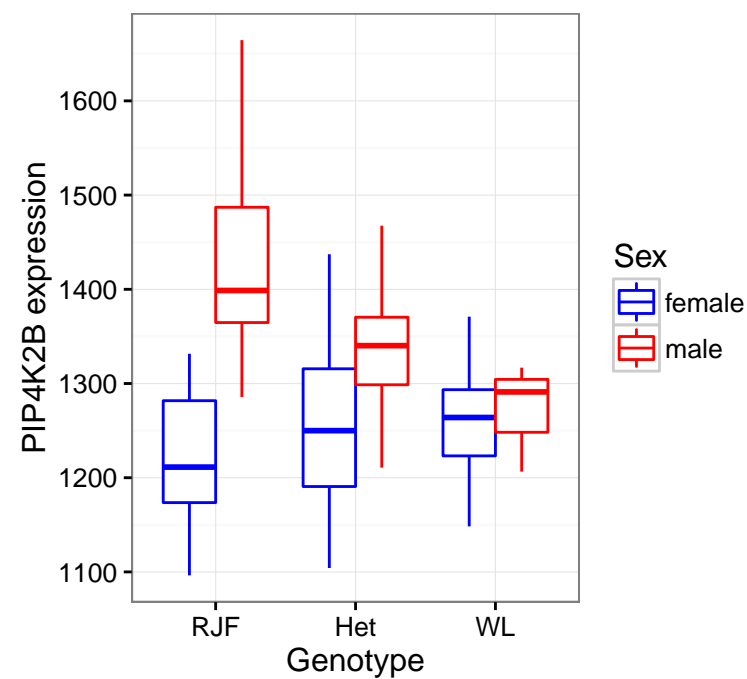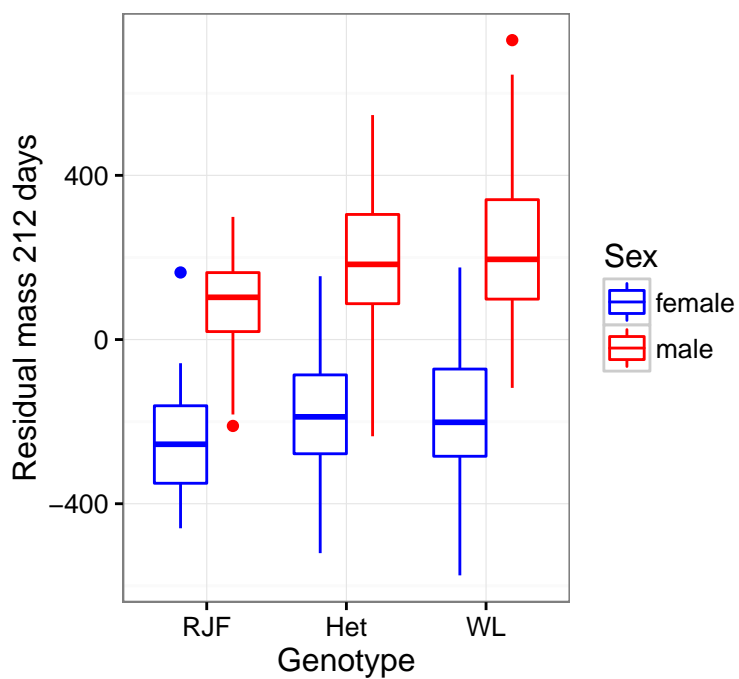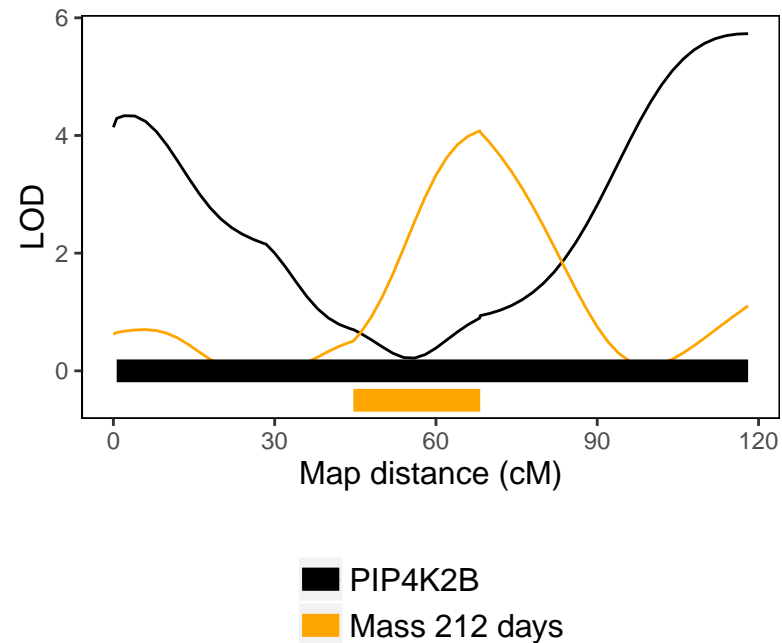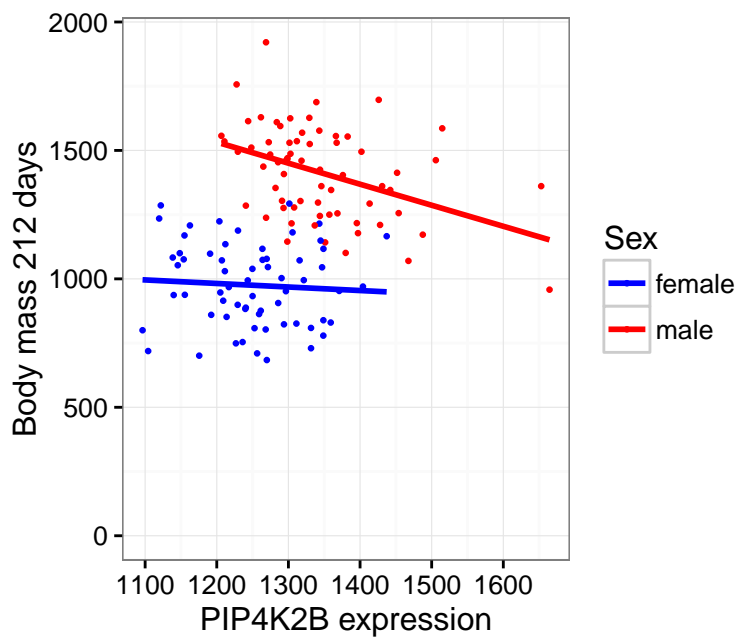

Supplement: 12864_2018_4441_MOESM8_ESM.pdf [file 12864_2018_4441_MOESM8_ESM.pdf]
