# Supplementary material for: Genetical genomics of growth in a chicken model
Source: PubMed Central journal article supplement (PMC5782384; doi:10.1186/s12864-018-4441-3), 2018-01-23

ENSGALT00000000548\_LOXL2

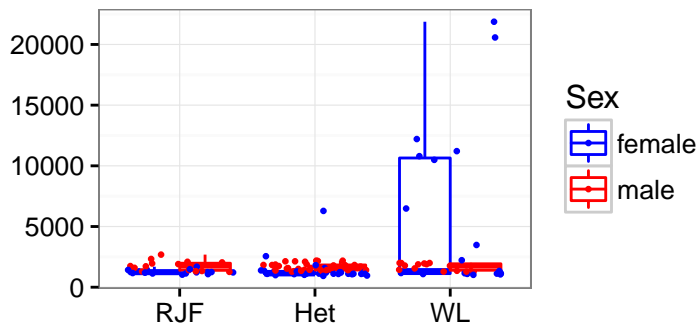

ENSGALT000000034389\_LOC415708

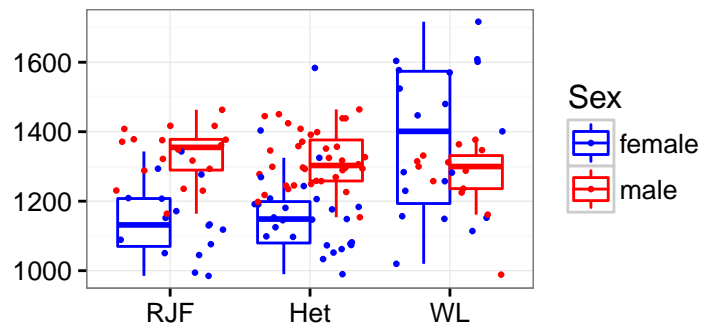

ENSGALT00000002921\_UPK3B

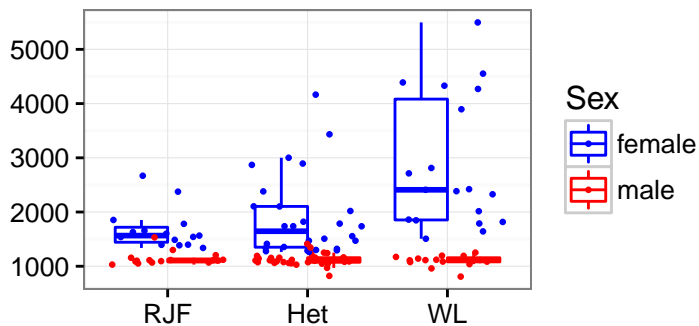

ENSGALT000000037665\_RASA1

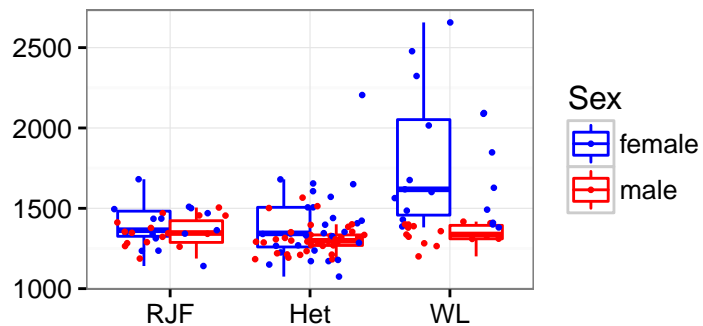

ENSGALT00000006851\_ENSGALG000000004299

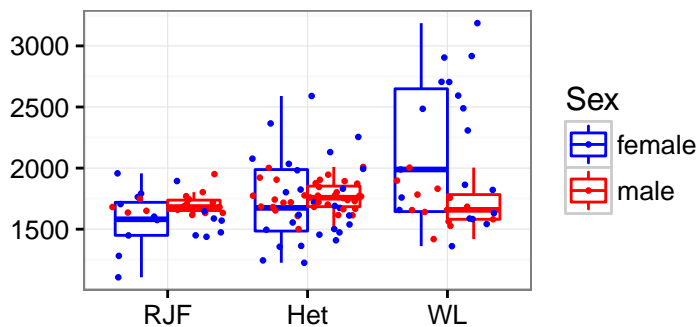

ENSGALT000000039113\_OCX32\_CHICK

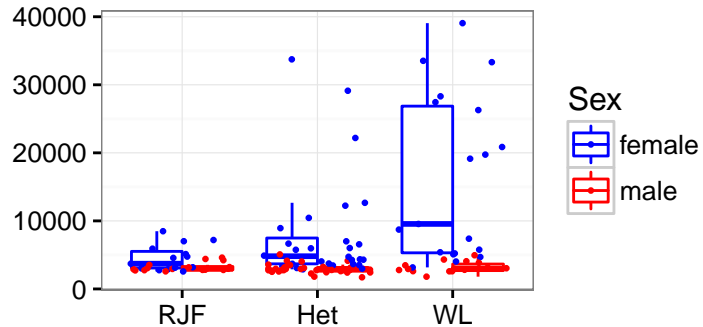

ENSGALT000000020835\_CHPT1\_CHICK

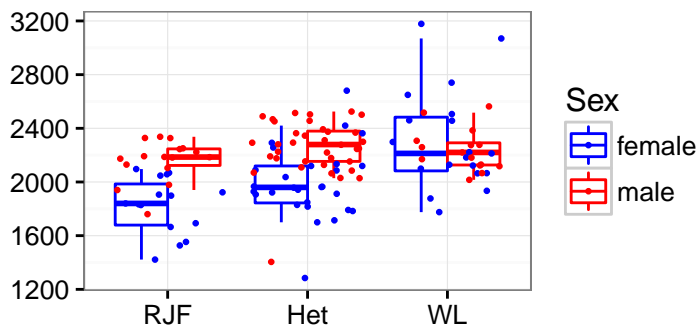

NM\_204534\_RARRES1

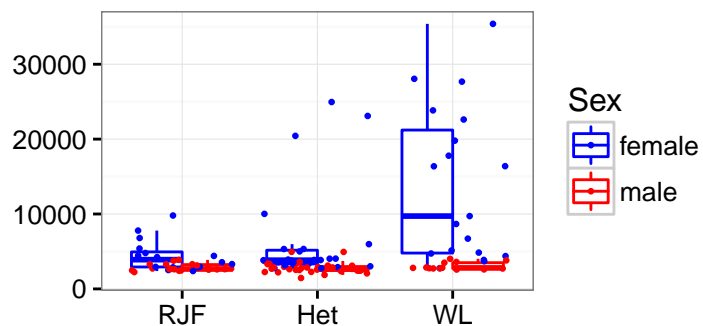

ENSGALT000000024133\_COAA1\_CHICK

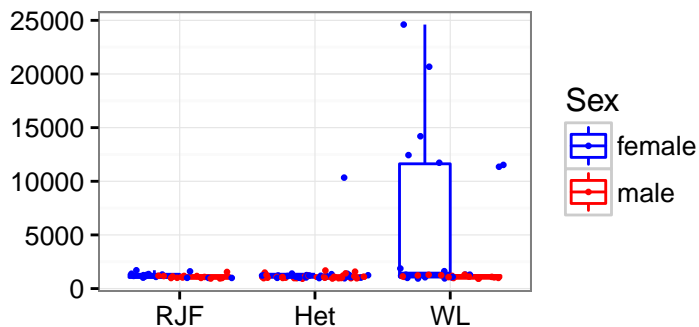

NM\_204937\_COCH

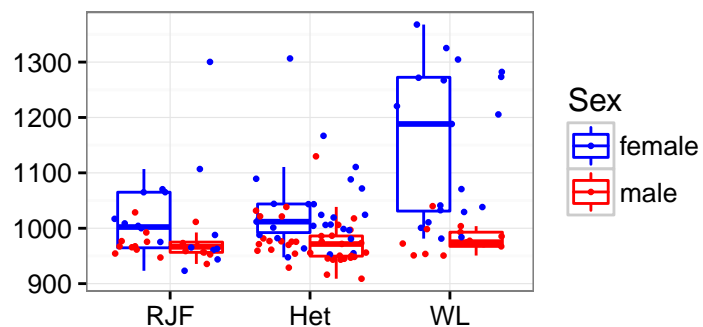

Supplement: 12864_2018_4441_MOESM11_ESM.pdf [file 12864_2018_4441_MOESM11_ESM.pdf]
