# Supplementary material for: Genetical genomics of growth in a chicken model
Source: BMC Genomics. 2018 Jan 23;19:72. doi: 10.1186/s12864-018-4441-3 (PMC5782384; doi:10.1186/s12864-018-4441-3)
Supplement: Supplementary file 1 — Number of overlaps between quantitative trait locus regions and selective sweep regions from [50]. (CSV 426 bytes) [file 12864_2018_4441_MOESM1_ESM.csv]

trait	chr	Mb	all_domestic_sweeps	layer_sweeps
w42	1	34	0	3
w212	1	34	0	3
g112.212	1	34	0	3
w112	1	34	0	3
g42.112	1	35	0	3
g42.112	1	81	0	2
w112	1	81	0	2
g112.212	2	18	0	0
w42	2	34	0	0
w42	3	93	0	0
w212	4	31	0	0
g42.112	4	76	4	1
w212	6	21	1	1
g42.112	6	27	0	0
w112	6	27	0	0
w42	10	12	1	0
g112.212	11	1	5	3
w212	12	5	0	0
g42.112	12	5	1	0
g42.112	17	9	0	0
w112	23	5	0	0
g42.112	23	5	0	0
w212	24	1	0	0
w112	27	3	0	0
w212	27	3	0	0
